# Supplementary material for: Discovery of Azurin-Like Anticancer Bacteriocins from Human Gut Microbiome through Homology Modeling and Molecular Docking against the Tumor Suppressor p53
Source: Hindawi journal article supplement (doi:10.1155/2016/8490482), 2016-01-01
Supplement: f1 [file 8490482.f1.pdf]

## Supplementary Material

Table S1. Functional prediction of 81 putative bacteriocins by ProtFun server using predicted functions of azurin as reference. The sequences are sorted by odd score from high to low. The higher of the score, the higher of the odds that the sequence belongs to the same categories with the azurin.

| No. | Sequence ID | Cellular envelope Probability (a) | Non enzyme Probability (b) | Immune response Probability (c) | Probability product of (a), (b), and (c) | <b>Log10 (Probability product)</b> | Cellular envelope Odds | Non enzyme Odds | Immune response Odds | Odds product | <b>Log10 (Odds product)</b> |
|-----|-------------|-----------------------------------|----------------------------|---------------------------------|------------------------------------------|------------------------------------|------------------------|-----------------|----------------------|--------------|-----------------------------|
|     | azurin      | 0.592                             | 0.818                      | 0.5                             | 2.42E-01                                 | <b>-0.6</b>                        | 9.71                   | 1.147           | 5.877                | 65.5         | <b>1.8</b>                  |
| 1   | p2seq07     | 0.621                             | 0.441                      | 0.345                           | 9.45E-02                                 | <b>-1.0</b>                        | <b>10.2</b>            | 0.6             | 4.1                  | <b>25.5</b>  | <b>1.4</b>                  |
| 2   | p1seq19     | 0.514                             | 0.547                      | 0.189                           | 5.31E-02                                 | <b>-1.3</b>                        | 8.4                    | 0.8             | 2.2                  | 14.4         | <b>1.2</b>                  |
| 3   | p2seq31     | 0.237                             | 0.651                      | 0.305                           | 4.71E-02                                 | <b>-1.3</b>                        | 3.9                    | 0.9             | 3.6                  | 12.7         | <b>1.1</b>                  |
| 4   | p1seq16     | 0.413                             | 0.515                      | 0.186                           | 3.96E-02                                 | <b>-1.4</b>                        | 6.8                    | 0.7             | 2.2                  | 10.7         | <b>1.0</b>                  |
| 5   | p1seq02     | 0.427                             | 0.371                      | 0.18                            | 2.85E-02                                 | <b>-1.5</b>                        | 7.0                    | 0.5             | 2.1                  | 7.7          | <b>0.9</b>                  |
| 6   | p2seq33     | 0.416                             | 0.494                      | 0.138                           | 2.84E-02                                 | <b>-1.5</b>                        | 6.8                    | 0.7             | 1.6                  | 7.7          | <b>0.9</b>                  |
| 7   | p3seq02     | 0.108                             | 0.486                      | 0.421                           | 2.21E-02                                 | <b>-1.7</b>                        | 1.8                    | 0.7             | <b>5.0</b>           | 6.0          | <b>0.8</b>                  |
| 8   | p3seq17     | 0.1                               | 0.537                      | 0.376                           | 2.02E-02                                 | <b>-1.7</b>                        | 1.6                    | 0.8             | 4.4                  | 5.5          | <b>0.7</b>                  |
| 9   | p2seq12     | 0.052                             | 0.778                      | 0.309                           | 1.25E-02                                 | <b>-1.9</b>                        | 0.9                    | 1.1             | 3.6                  | 3.4          | <b>0.5</b>                  |
| 10  | p3seq29     | 0.284                             | 0.43                       | 0.091                           | 1.11E-02                                 | <b>-2.0</b>                        | 4.7                    | 0.6             | 1.1                  | 3.0          | <b>0.5</b>                  |
| 11  | p3seq13     | 0.041                             | 0.811                      | 0.292                           | 9.71E-03                                 | <b>-2.0</b>                        | 0.7                    | 1.1             | 3.4                  | 2.6          | <b>0.4</b>                  |
| 12  | p2seq14     | 0.051                             | 0.721                      | 0.256                           | 9.41E-03                                 | <b>-2.0</b>                        | 0.8                    | 1.0             | 3.0                  | 2.6          | <b>0.4</b>                  |
| 13  | p2seq24     | 0.035                             | 0.708                      | 0.363                           | 9.00E-03                                 | <b>-2.0</b>                        | 0.6                    | 1.0             | 4.3                  | 2.4          | <b>0.4</b>                  |
| 14  | p2seq08     | 0.175                             | 0.713                      | 0.07                            | 8.73E-03                                 | <b>-2.1</b>                        | 2.9                    | 1.0             | 0.8                  | 2.4          | <b>0.4</b>                  |

|    |         |       |       |       |          |             |     |     |     |     |             |
|----|---------|-------|-------|-------|----------|-------------|-----|-----|-----|-----|-------------|
| 15 | p2seq20 | 0.033 | 0.8   | 0.328 | 8.66E-03 | <b>-2.1</b> | 0.5 | 1.1 | 3.9 | 2.3 | <b>0.4</b>  |
| 16 | p3seq09 | 0.032 | 0.715 | 0.369 | 8.44E-03 | <b>-2.1</b> | 0.5 | 1.0 | 4.3 | 2.3 | <b>0.4</b>  |
| 17 | p1seq03 | 0.029 | 0.651 | 0.383 | 7.23E-03 | <b>-2.1</b> | 0.5 | 0.9 | 4.5 | 2.0 | <b>0.3</b>  |
| 18 | p1seq09 | 0.052 | 0.653 | 0.215 | 7.30E-03 | <b>-2.1</b> | 0.9 | 0.9 | 2.5 | 2.0 | <b>0.3</b>  |
| 19 | p2seq30 | 0.206 | 0.754 | 0.047 | 7.30E-03 | <b>-2.1</b> | 3.4 | 1.1 | 0.5 | 2.0 | <b>0.3</b>  |
| 20 | p3seq16 | 0.03  | 0.646 | 0.361 | 7.00E-03 | <b>-2.2</b> | 0.5 | 0.9 | 4.2 | 1.9 | <b>0.3</b>  |
| 21 | p2seq18 | 0.035 | 0.535 | 0.303 | 5.67E-03 | <b>-2.2</b> | 0.6 | 0.7 | 3.6 | 1.5 | <b>0.2</b>  |
| 22 | p2seq32 | 0.347 | 0.396 | 0.041 | 5.63E-03 | <b>-2.2</b> | 5.7 | 0.6 | 0.5 | 1.5 | <b>0.2</b>  |
| 23 | p3seq01 | 0.035 | 0.585 | 0.252 | 5.16E-03 | <b>-2.3</b> | 0.6 | 0.8 | 3.0 | 1.4 | <b>0.1</b>  |
| 24 | p2seq05 | 0.296 | 0.415 | 0.039 | 4.79E-03 | <b>-2.3</b> | 4.9 | 0.6 | 0.5 | 1.3 | <b>0.1</b>  |
| 25 | p1seq18 | 0.032 | 0.469 | 0.297 | 4.46E-03 | <b>-2.4</b> | 0.5 | 0.7 | 3.5 | 1.2 | <b>0.1</b>  |
| 26 | p3seq21 | 0.032 | 0.639 | 0.221 | 4.52E-03 | <b>-2.3</b> | 0.5 | 0.9 | 2.6 | 1.2 | <b>0.1</b>  |
| 27 | p3seq24 | 0.126 | 0.788 | 0.045 | 4.47E-03 | <b>-2.3</b> | 2.1 | 1.1 | 0.5 | 1.2 | <b>0.1</b>  |
| 28 | p3seq04 | 0.031 | 0.529 | 0.263 | 4.31E-03 | <b>-2.4</b> | 0.5 | 0.7 | 3.1 | 1.2 | <b>0.1</b>  |
| 29 | p1seq11 | 0.029 | 0.807 | 0.167 | 3.91E-03 | <b>-2.4</b> | 0.5 | 1.1 | 2.0 | 1.1 | <b>0.0</b>  |
| 30 | p2seq16 | 0.035 | 0.493 | 0.22  | 3.80E-03 | <b>-2.4</b> | 0.6 | 0.7 | 2.6 | 1.0 | <b>0.0</b>  |
| 31 | p2seq01 | 0.032 | 0.749 | 0.138 | 3.31E-03 | <b>-2.5</b> | 0.5 | 1.1 | 1.6 | 0.9 | <b>0.0</b>  |
| 32 | p2seq21 | 0.06  | 0.531 | 0.097 | 3.09E-03 | <b>-2.5</b> | 1.0 | 0.7 | 1.1 | 0.8 | <b>-0.1</b> |
| 33 | p2seq03 | 0.032 | 0.534 | 0.18  | 3.08E-03 | <b>-2.5</b> | 0.5 | 0.7 | 2.1 | 0.8 | <b>-0.1</b> |
| 34 | p3seq03 | 0.048 | 0.715 | 0.081 | 2.78E-03 | <b>-2.6</b> | 0.8 | 1.0 | 1.0 | 0.8 | <b>-0.1</b> |
| 35 | p2seq11 | 0.033 | 0.742 | 0.113 | 2.77E-03 | <b>-2.6</b> | 0.5 | 1.0 | 1.3 | 0.8 | <b>-0.1</b> |
| 36 | p3seq15 | 0.032 | 0.456 | 0.19  | 2.77E-03 | <b>-2.6</b> | 0.5 | 0.6 | 2.2 | 0.7 | <b>-0.1</b> |
| 37 | p2seq09 | 0.032 | 0.641 | 0.129 | 2.65E-03 | <b>-2.6</b> | 0.5 | 0.9 | 1.5 | 0.7 | <b>-0.1</b> |

|    |         |       |       |       |          |             |     |            |     |     |             |
|----|---------|-------|-------|-------|----------|-------------|-----|------------|-----|-----|-------------|
| 38 | p1seq12 | 0.037 | 0.605 | 0.116 | 2.60E-03 | <b>-2.6</b> | 0.6 | 0.8        | 1.4 | 0.7 | <b>-0.2</b> |
| 39 | p1seq14 | 0.033 | 0.807 | 0.087 | 2.32E-03 | <b>-2.6</b> | 0.5 | 1.1        | 1.0 | 0.6 | <b>-0.2</b> |
| 40 | p2seq13 | 0.033 | 0.725 | 0.092 | 2.20E-03 | <b>-2.7</b> | 0.5 | 1.0        | 1.1 | 0.6 | <b>-0.2</b> |
| 41 | p2seq19 | 0.046 | 0.752 | 0.061 | 2.11E-03 | <b>-2.7</b> | 0.8 | 1.1        | 0.7 | 0.6 | <b>-0.2</b> |
| 42 | p3seq08 | 0.092 | 0.429 | 0.047 | 1.85E-03 | <b>-2.7</b> | 1.5 | 0.6        | 0.6 | 0.5 | <b>-0.3</b> |
| 43 | p1seq07 | 0.032 | 0.75  | 0.07  | 1.68E-03 | <b>-2.8</b> | 0.5 | 1.1        | 0.8 | 0.5 | <b>-0.3</b> |
| 44 | p2seq02 | 0.171 | 0.781 | 0.012 | 1.60E-03 | <b>-2.8</b> | 2.8 | 1.1        | 0.1 | 0.4 | <b>-0.4</b> |
| 45 | p1seq04 | 0.039 | 0.822 | 0.046 | 1.47E-03 | <b>-2.8</b> | 0.6 | <b>1.2</b> | 0.5 | 0.4 | <b>-0.4</b> |
| 46 | p3seq22 | 0.032 | 0.687 | 0.061 | 1.34E-03 | <b>-2.9</b> | 0.5 | 1.0        | 0.7 | 0.4 | <b>-0.4</b> |
| 47 | p3seq14 | 0.033 | 0.804 | 0.049 | 1.30E-03 | <b>-2.9</b> | 0.5 | 1.1        | 0.6 | 0.4 | <b>-0.5</b> |
| 48 | p3seq10 | 0.036 | 0.581 | 0.057 | 1.19E-03 | <b>-2.9</b> | 0.6 | 0.8        | 0.7 | 0.3 | <b>-0.5</b> |
| 49 | p3seq06 | 0.033 | 0.759 | 0.046 | 1.15E-03 | <b>-2.9</b> | 0.5 | 1.1        | 0.5 | 0.3 | <b>-0.5</b> |
| 50 | p3seq18 | 0.034 | 0.774 | 0.04  | 1.05E-03 | <b>-3.0</b> | 0.6 | 1.1        | 0.5 | 0.3 | <b>-0.5</b> |
| 51 | p3seq05 | 0.029 | 0.703 | 0.048 | 9.79E-04 | <b>-3.0</b> | 0.5 | 1.0        | 0.6 | 0.3 | <b>-0.6</b> |
| 52 | p1seq13 | 0.03  | 0.631 | 0.043 | 8.14E-04 | <b>-3.1</b> | 0.5 | 0.9        | 0.5 | 0.2 | <b>-0.7</b> |
| 53 | p2seq06 | 0.169 | 0.3   | 0.015 | 7.61E-04 | <b>-3.1</b> | 2.8 | 0.4        | 0.2 | 0.2 | <b>-0.7</b> |
| 54 | p3seq20 | 0.031 | 0.627 | 0.037 | 7.19E-04 | <b>-3.1</b> | 0.5 | 0.9        | 0.4 | 0.2 | <b>-0.7</b> |
| 55 | p3seq26 | 0.031 | 0.82  | 0.027 | 6.86E-04 | <b>-3.2</b> | 0.5 | 1.1        | 0.3 | 0.2 | <b>-0.7</b> |
| 56 | p3seq19 | 0.029 | 0.784 | 0.029 | 6.59E-04 | <b>-3.2</b> | 0.5 | 1.1        | 0.3 | 0.2 | <b>-0.7</b> |
| 57 | p2seq04 | 0.045 | 0.744 | 0.02  | 6.70E-04 | <b>-3.2</b> | 0.7 | 1.0        | 0.2 | 0.2 | <b>-0.7</b> |
| 58 | p2seq26 | 0.043 | 0.78  | 0.019 | 6.37E-04 | <b>-3.2</b> | 0.7 | 1.1        | 0.2 | 0.2 | <b>-0.8</b> |
| 59 | p2seq25 | 0.031 | 0.808 | 0.024 | 6.01E-04 | <b>-3.2</b> | 0.5 | 1.1        | 0.3 | 0.2 | <b>-0.8</b> |
| 60 | p1seq08 | 0.032 | 0.784 | 0.024 | 6.02E-04 | <b>-3.2</b> | 0.5 | 1.1        | 0.3 | 0.2 | <b>-0.8</b> |

|    |         |       |       |       |          |             |     |     |     |     |             |
|----|---------|-------|-------|-------|----------|-------------|-----|-----|-----|-----|-------------|
| 61 | p3seq23 | 0.032 | 0.657 | 0.026 | 5.47E-04 | <b>-3.3</b> | 0.5 | 0.9 | 0.3 | 0.1 | <b>-0.8</b> |
| 62 | p2seq10 | 0.053 | 0.8   | 0.012 | 5.09E-04 | <b>-3.3</b> | 0.9 | 1.1 | 0.1 | 0.1 | <b>-0.9</b> |
| 63 | p3seq07 | 0.029 | 0.71  | 0.022 | 4.53E-04 | <b>-3.3</b> | 0.5 | 1.0 | 0.3 | 0.1 | <b>-0.9</b> |
| 64 | p2seq28 | 0.035 | 0.762 | 0.017 | 4.53E-04 | <b>-3.3</b> | 0.6 | 1.1 | 0.2 | 0.1 | <b>-0.9</b> |
| 65 | p3seq25 | 0.033 | 0.773 | 0.017 | 4.34E-04 | <b>-3.4</b> | 0.5 | 1.1 | 0.2 | 0.1 | <b>-0.9</b> |
| 66 | p2seq17 | 0.033 | 0.729 | 0.017 | 4.09E-04 | <b>-3.4</b> | 0.5 | 1.0 | 0.2 | 0.1 | <b>-0.9</b> |
| 67 | p3seq12 | 0.034 | 0.517 | 0.023 | 4.04E-04 | <b>-3.4</b> | 0.6 | 0.7 | 0.3 | 0.1 | <b>-0.9</b> |
| 68 | p2seq29 | 0.031 | 0.698 | 0.019 | 4.11E-04 | <b>-3.4</b> | 0.5 | 1.0 | 0.2 | 0.1 | <b>-1.0</b> |
| 69 | p2seq23 | 0.042 | 0.733 | 0.011 | 3.39E-04 | <b>-3.5</b> | 0.7 | 1.0 | 0.1 | 0.1 | <b>-1.1</b> |
| 70 | p3seq11 | 0.032 | 0.729 | 0.013 | 3.03E-04 | <b>-3.5</b> | 0.5 | 1.0 | 0.1 | 0.1 | <b>-1.1</b> |
| 71 | p1seq10 | 0.034 | 0.774 | 0.011 | 2.89E-04 | <b>-3.5</b> | 0.6 | 1.1 | 0.1 | 0.1 | <b>-1.1</b> |
| 72 | p1seq01 | 0.037 | 0.22  | 0.035 | 2.85E-04 | <b>-3.5</b> | 0.6 | 0.3 | 0.4 | 0.1 | <b>-1.1</b> |
| 73 | p2seq27 | 0.031 | 0.801 | 0.011 | 2.73E-04 | <b>-3.6</b> | 0.5 | 1.1 | 0.1 | 0.1 | <b>-1.1</b> |
| 74 | p1seq06 | 0.033 | 0.78  | 0.01  | 2.57E-04 | <b>-3.6</b> | 0.5 | 1.1 | 0.1 | 0.1 | <b>-1.1</b> |
| 75 | p2seq22 | 0.029 | 0.705 | 0.012 | 2.45E-04 | <b>-3.6</b> | 0.5 | 1.0 | 0.1 | 0.1 | <b>-1.2</b> |
| 76 | p2seq15 | 0.029 | 0.786 | 0.011 | 2.51E-04 | <b>-3.6</b> | 0.5 | 1.1 | 0.1 | 0.1 | <b>-1.2</b> |
| 77 | p1seq17 | 0.029 | 0.681 | 0.012 | 2.37E-04 | <b>-3.6</b> | 0.5 | 1.0 | 0.1 | 0.1 | <b>-1.2</b> |
| 78 | p3seq27 | 0.032 | 0.568 | 0.012 | 2.18E-04 | <b>-3.7</b> | 0.5 | 0.8 | 0.1 | 0.1 | <b>-1.2</b> |
| 79 | p1seq05 | 0.032 | 0.28  | 0.024 | 2.15E-04 | <b>-3.7</b> | 0.5 | 0.4 | 0.3 | 0.1 | <b>-1.2</b> |
| 80 | p1seq15 | 0.032 | 0.406 | 0.014 | 1.82E-04 | <b>-3.7</b> | 0.5 | 0.6 | 0.2 | 0.0 | <b>-1.3</b> |
| 81 | p3seq28 | 0.037 | 0.371 | 0.01  | 1.37E-04 | <b>-3.9</b> | 0.6 | 0.5 | 0.1 | 0.0 | <b>-1.4</b> |

Table S2. Model assessments for the 14 most putative anticancer azurin-like bacteriocins

| No. | Sequence ID | Before refinement |                      | After refinement |                      |
|-----|-------------|-------------------|----------------------|------------------|----------------------|
|     |             | Favored rotamers  | Ramachandran favored | Favored rotamers | Ramachandran favored |
| 1   | p2seq05     | 73.46%            | 64.62%               | 96.21%           | 88.08%               |
| 2   | p3seq17     | 67.74%            | 50.75%               | 100.00%          | 88.06%               |
| 3   | p3seq16     | 67.39%            | 47.06%               | 95.65%           | 92.16%               |
| 4   | p3seq24     | 83.56%            | 77.33%               | 98.63%           | 96.00%               |
| 5   | p2seq14     | 75.00%            | 54.55%               | 100.00%          | 90.91%               |
| 6   | p2seq08     | 78.79%            | 69.57%               | 96.97%           | 91.30%               |
| 7   | p2seq33     | 72.13%            | 69.86%               | 96.86%           | 89.01%               |
| 8   | p2seq32     | 72.89%            | 70.74%               | 96.83%           | 91.48%               |
| 9   | p2seq18     | 60.76%            | 50.00%               | 100.00%          | 96.15%               |
| 10  | p2seq20     | 74.29%            | 43.59%               | 94.29%           | 79.49%               |
| 11  | p1seq09     | 85.71%            | 69.70%               | 100.00%          | 100.00%              |
| 12  | p1seq16     | 70.33%            | 64.76%               | 96.70%           | 85.24%               |
| 13  | p3seq02     | 78.57%            | 65.52%               | 96.43%           | 93.10%               |
| 14  | p3seq04     | 66.67%            | 34.48%               | 92.59%           | 79.31%               |











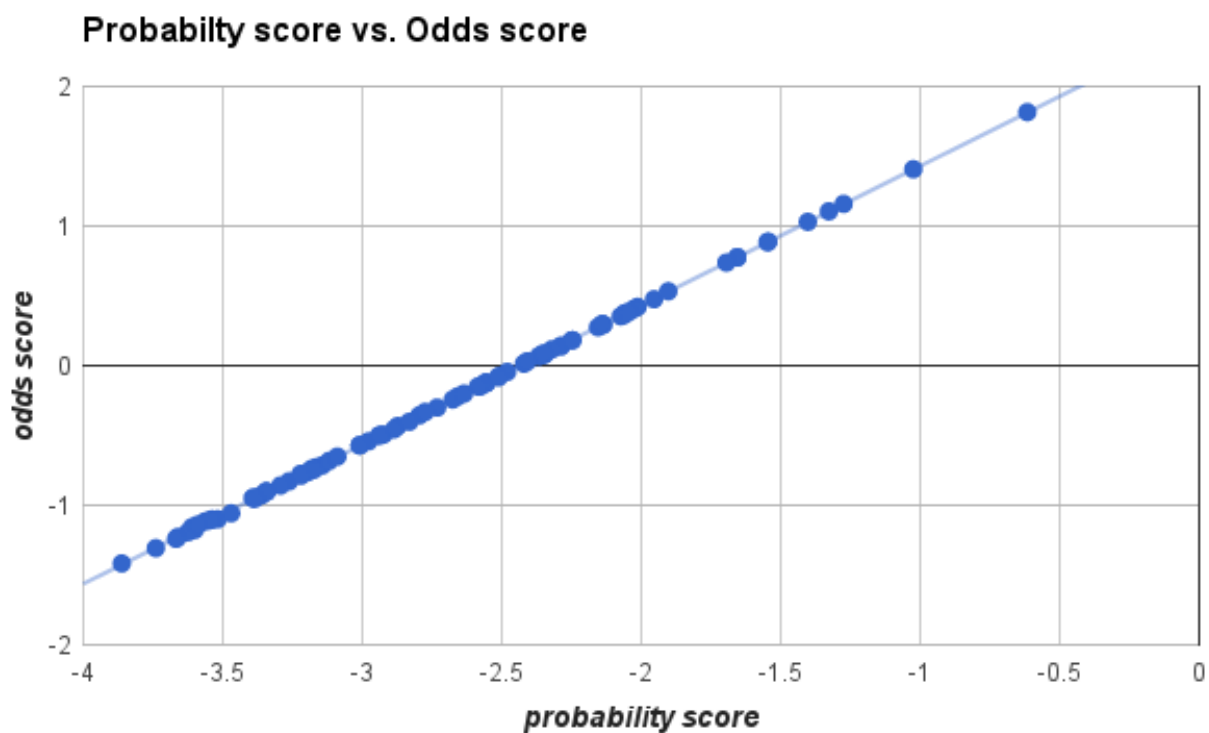

Figure S1. Plot of probability score versus odds score for 81 putative bacteriocins expressed in Table S1

p2seq05

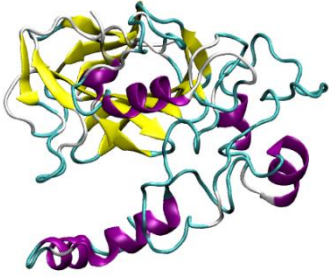

p3seq17

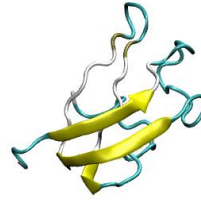

p3seq16

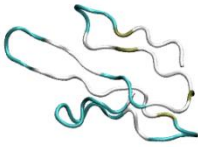

p3seq24

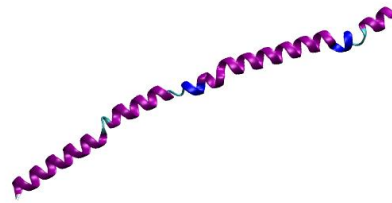

p2seq14

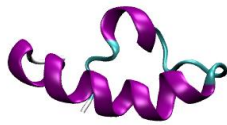

p2seq08

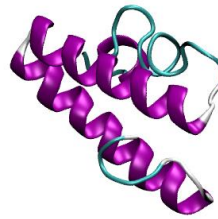

p2seq33

p2seq32

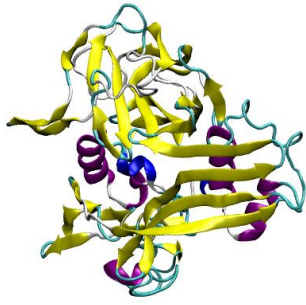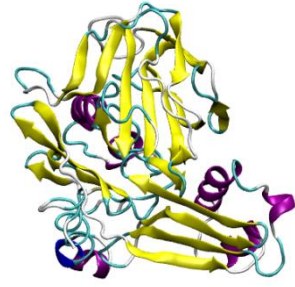

p2seq18

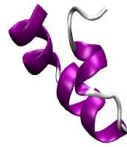

p2seq20

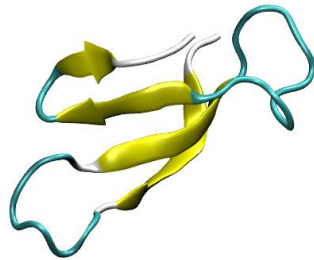

p1seq09

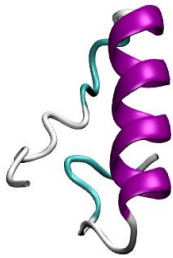

p1seq16

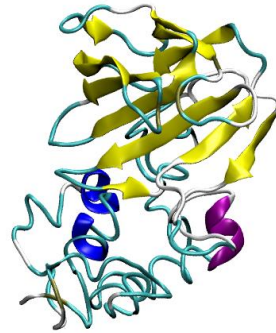

p3seq02

p3seq04

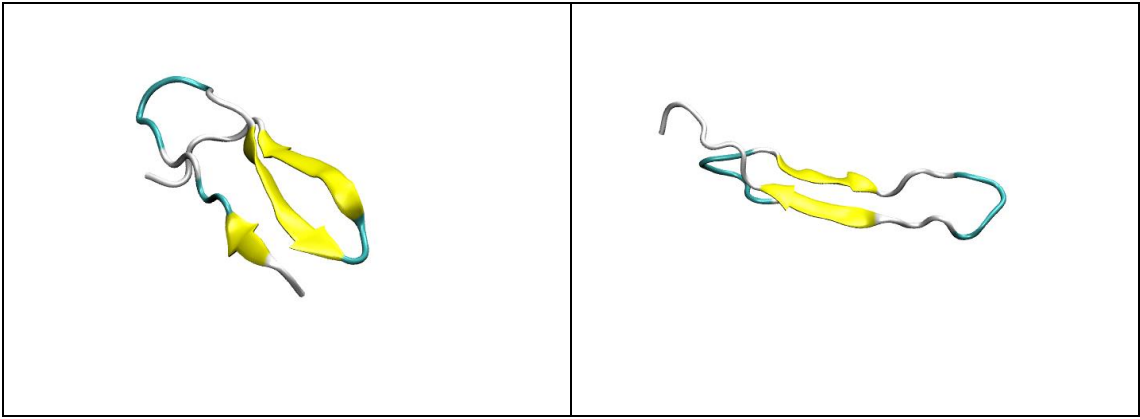

Figure S2. Models of 14 most putative anticancer azurin-like bacteriocins

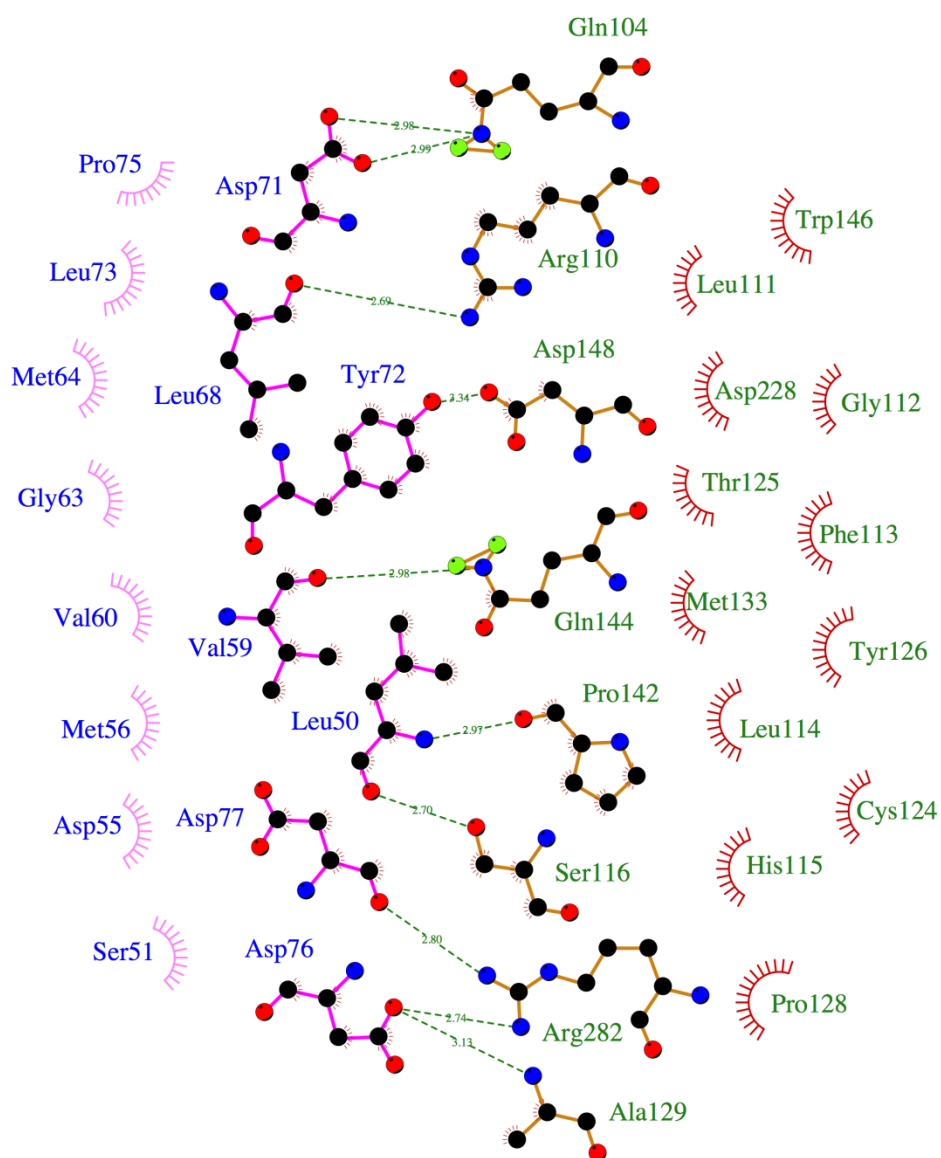

Figure S3. Amino acids involved in binding site of docking model between p53 DBD and p28-azurin. Name of amino acids of p28-azurin are in blue and those of p53 DBD are in green. Hydrogen bonds are shown in dot green line along with molecular details of donors and acceptors.

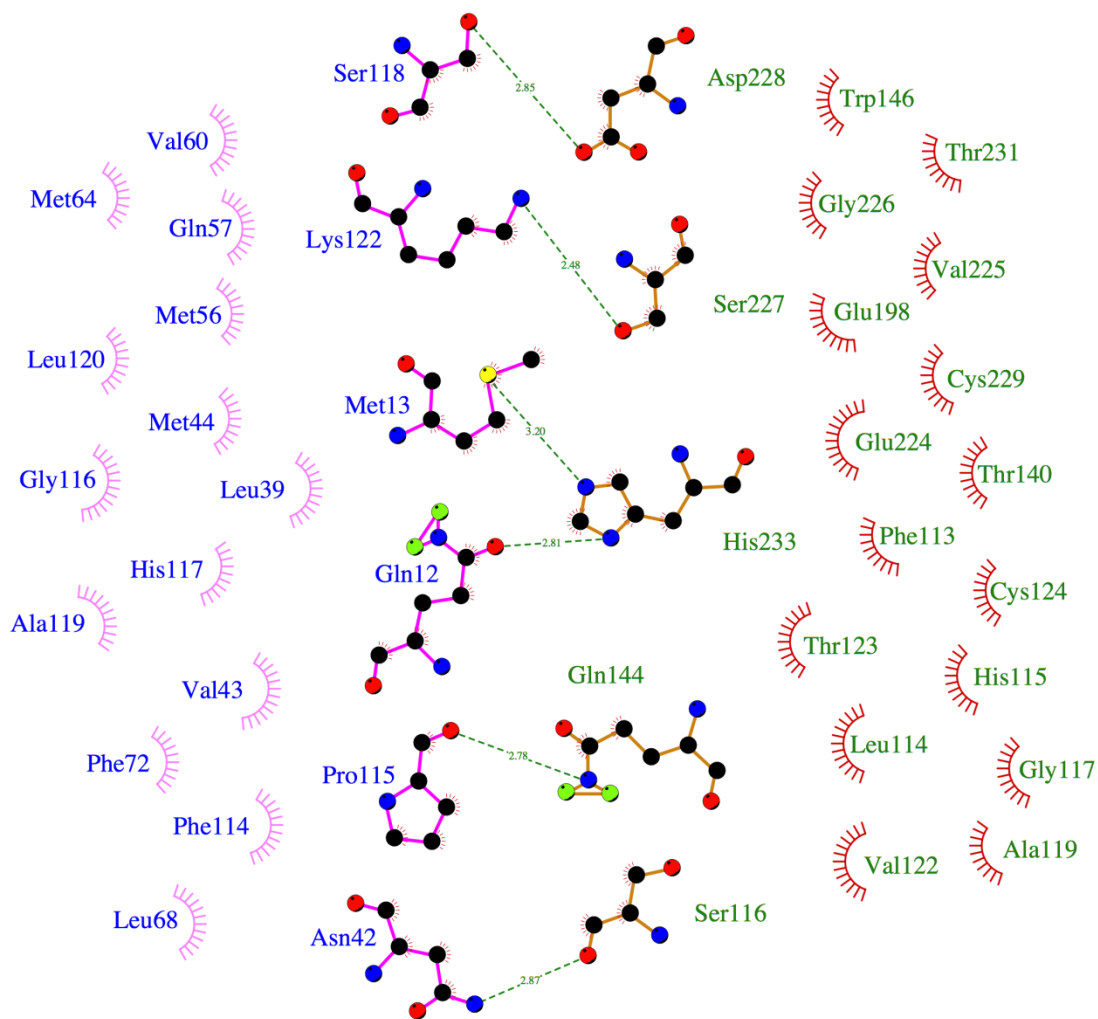

Figure S4. Amino acids involved in binding site of docking model between p53 DBD and azurin. Names of amino acids of azurin are in blue and those of p53 DBD are in green. Hydrogen bonds are shown in dot green line along with molecular details of donors and acceptors.
